# Supplementary material for: Spinel Zn3V3O8 nanosheets via a one-step hydrothermal synthesis with peroxidase-like activity for high sensitivity glucose colorimetric detection in synthetic perspiration
Source: Royal Society of Chemistry journal article supplement (doi:10.1039/d1tb00608h), 2021-01-01
Supplement: d1tb00608h1.pdf [file d1tb00608h1.pdf]

**Spinel  $Zn_3V_3O_8$  nanosheets via one - step hydrothermal synthesis with peroxidase-like activity for high-sensitive glucose colorimetric detection in synthetic perspiration**

Guizeng Yang <sup>a,b,c</sup>, Yi Lu <sup>a,b</sup>, Yi Li <sup>a</sup>, Meihui Ying <sup>a,b,c</sup>, Haibo Pan <sup>a,b,c\*</sup>, Jiayuan Qi <sup>a\*</sup>, Min Du <sup>c</sup>

<sup>a</sup> College of Chemistry, Fuzhou University, Fuzhou, Fujian 350108, P. R. China.

<sup>b</sup> National & Local Joint Biomedical Engineering Research Center on Photodynamics

Technology, Fuzhou, Fujian 350108, P. R. China.

<sup>c</sup> Fujian Key Lab of Medical Instrument and Pharmaceutical Technology, Fuzhou University,

Fuzhou, Fujian 350108, P. R. China

Corresponding author: Prof. Haibo Pan and Dr. Jiayuan Qi

Tel.: +86-591-83759450/22866127; fax: +86-591-22866127

E-mail: hbpan@fzu.edu.cn (H. Pan), jyqi@fzu.edu.cn (J. Qi)

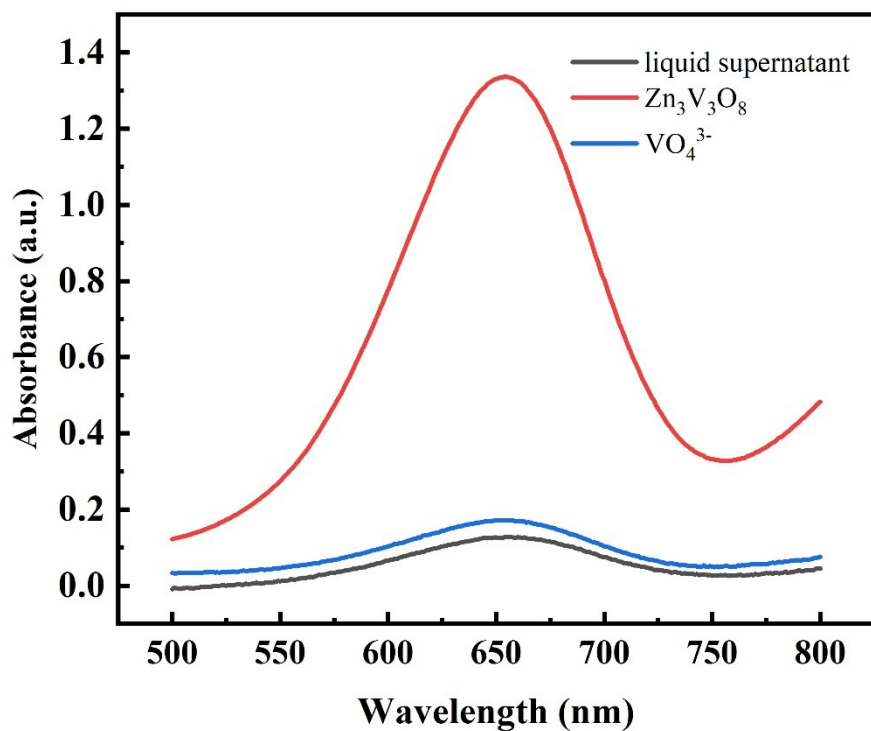

Fig. S1 UV-vis absorption spectra of different reaction systems in  $H_2O$ ,  $Zn_3V_3O_8 + H_2O_2 + TMB$  (red line),  $Zn_3V_3O_8$  liquid supernatant+  $H_2O_2 + TMB$  (blue line) and  $VO_4^{3-} + H_2O_2 + TMB$  (black line).

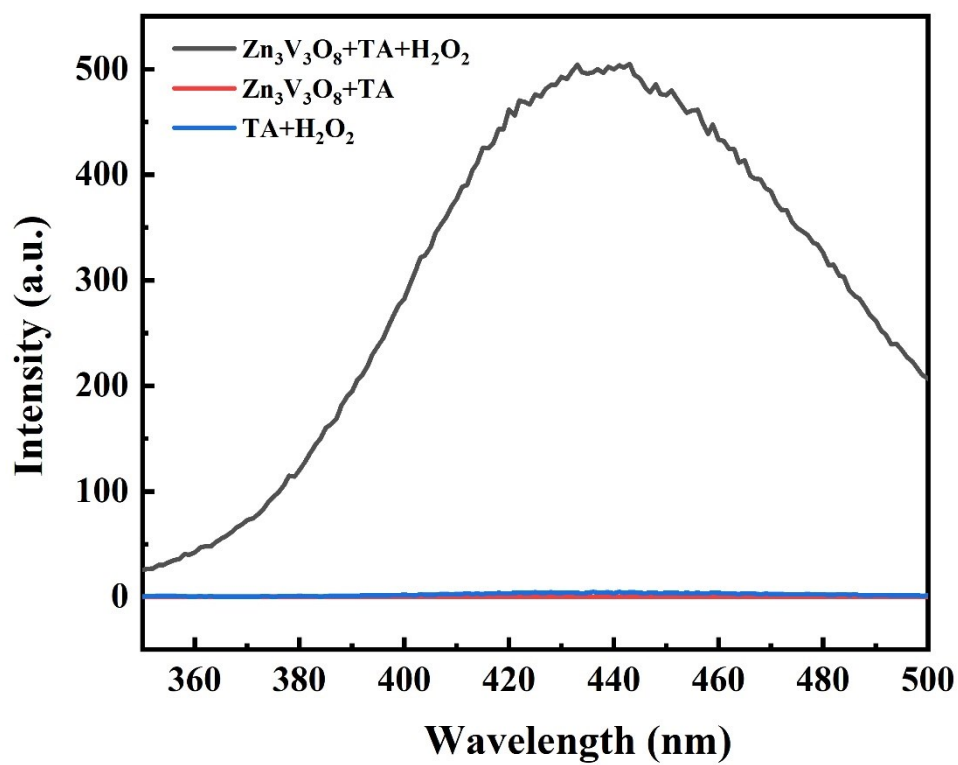

Fig. S2 The fluorescence intensity of the  $\text{H}_2\text{O}_2 + \text{Zn}_3\text{V}_3\text{O}_8$  NSs system generated hydroxyl radicals captured by p-Phthalic acid (PTA).

Table S1 Comparison of kinetic parameters for peroxidase-like nanomaterials and horseradish peroxidase (HRP)

| Catalyst                                          | Substrate                     | $K_m$ (mM) | $V_{max}$ ( $10^{-8}$ M s $^{-1}$ ) | References |
|---------------------------------------------------|-------------------------------|------------|-------------------------------------|------------|
| HRP                                               | TMB                           | 0.434      | 10                                  | 1          |
|                                                   | H <sub>2</sub> O <sub>2</sub> | 3.7        | 8.71                                |            |
| VO <sub>2</sub> (B)                               | TMB                           | 0.146      | 131                                 | 2          |
|                                                   | H <sub>2</sub> O <sub>2</sub> | 1.69       | 177                                 |            |
| V <sub>6</sub> O <sub>13</sub>                    | TMB                           | 0.153      | 2.99                                | 3          |
|                                                   | H <sub>2</sub> O <sub>2</sub> | 1.51       | 3.12                                |            |
| Zn <sub>3</sub> V <sub>3</sub> O <sub>8</sub> NSs | TMB                           | 0.271      | 9.196                               | This work  |
|                                                   | H <sub>2</sub> O <sub>2</sub> | 1.317      | 1.2                                 |            |

Table S2 Comparative table of colorimetric detection for glucose

| Sensing probe                                     | Linear range ( $\mu\text{M}$ ) | Detection limit (M)    | Reference |
|---------------------------------------------------|--------------------------------|------------------------|-----------|
| Fe SSN                                            | 10–100                         | $8.20 \times 10^{-6}$  | 4         |
| Fe-MOF-GOx                                        | 1–500                          | $0.487 \times 10^{-6}$ | 5         |
| Pt/ cube-CeO <sub>2</sub>                         | 10-100                         | $4.10 \times 10^{-6}$  | 6         |
| Cu-Ag/rGO                                         | 1-30                           | $3.82 \times 10^{-6}$  | 7         |
| SGO <sub>x</sub> -NFs                             | Up to 100                      | $3.5 \times 10^{-6}$   | 8         |
| PEG-MNPs                                          | 5 -1000                        | $3 \times 10^{-6}$     | 9         |
| m-CeO <sub>2</sub>                                | 20-1000                        | $1 \times 10^{-5}$     | 10        |
| Zn <sub>3</sub> V <sub>3</sub> O <sub>8</sub> NSs | 10-500                         | $2.81 \times 10^{-7}$  | This work |

Scheme S1

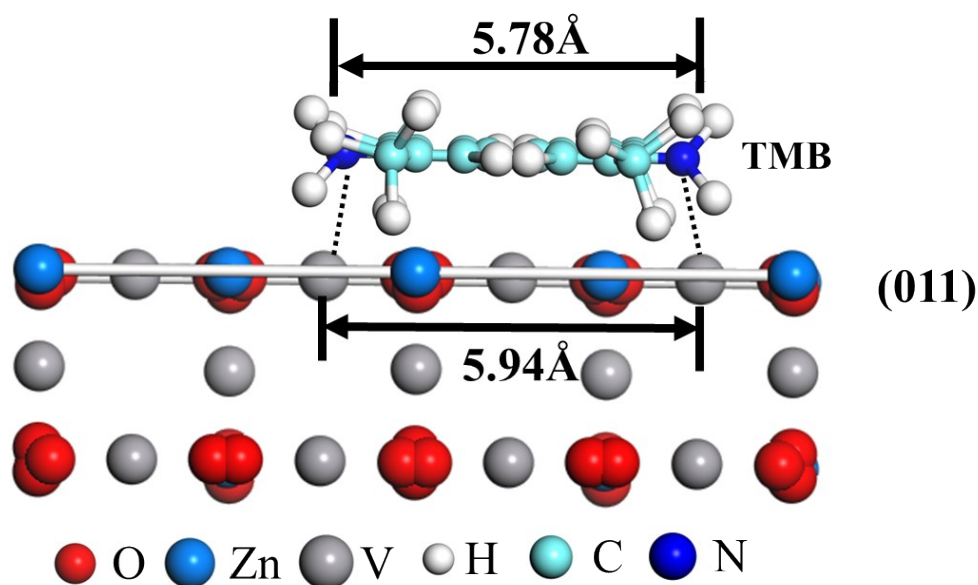

## Reference

1. L. Gao, J. Zhuang, L. Nie, J. Zhang, Y. Zhang, N. Gu, T. Wang, J. Feng, D. Yang, S. Perrett and X. Yan, *Nature Nanotechnology*, 2007, **2**, 577-583.
2. G. Nie, L. Zhang, J. Lei, L. Yang, Z. Zhang, X. Lu and C. Wang, *Journal of Materials Chemistry A*, 2014, **2**, 2910-2914.
3. H. Li, T. Wang, Y. Wang, S. Wang, P. Su and Y. Yang, *Industrial & Engineering Chemistry Research*, 2018, **57**, 2416-2425.
4. M. Chen, H. Zhou, X. Liu, T. Yuan, W. Wang, C. Zhao, Y. Zhao, F. Zhou, X. Wang, Z. Xue, T. Yao, C. Xiong and Y. Wu, *Small*, 2020, **16**, e2002343.
5. W. Xu, L. Jiao, H. Yan, Y. Wu, L. Chen, W. Gu, D. Du, Y. Lin and C. Zhu, *ACS Applied Materials & Interfaces*, 2019, **11**, 22096-22101.
6. Z. Li, X. Yang, Y. Yang, Y. Tan, Y. He, M. Liu, X. Liu and Q. Yuan, *Chemistry*, 2018, **24**, 409-415.
7. G. Darabdhara, B. Sharma, M. R. Das, R. Boukherroub and S. Szunerits, *Sensors and Actuators B: Chemical*, 2017, **238**, 842-851.
8. B. S. Batule, K. S. Park, S. Gautam, H. J. Cheon, M. I. Kim and H. G. Park, *Sensors and Actuators B: Chemical*, 2019, **283**, 749-754.
9. H. Y. Shin, B.-G. Kim, S. Cho, J. Lee, H. B. Na and M. I. Kim, *Microchimica Acta*, 2017, **184**, 2115-2122.
10. M. S. Kim, D. H. Kim, J. Lee, H. T. Ahn, M. I. Kim and J. Lee, *Nanoscale*, 2020, **12**, 1419-1424.
